# Supplementary material for: Genetic analysis of global faba bean diversity, agronomic traits and selection signatures
Source: PubMed Central journal article supplement (PMC10115707; doi:10.1007/s00122-023-04360-8), 2023-04-19

## Herbicide damage (Dyn21)

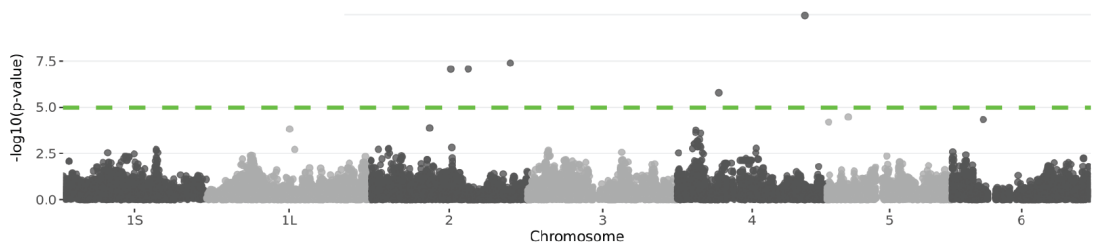

## Branching (Dyn20)

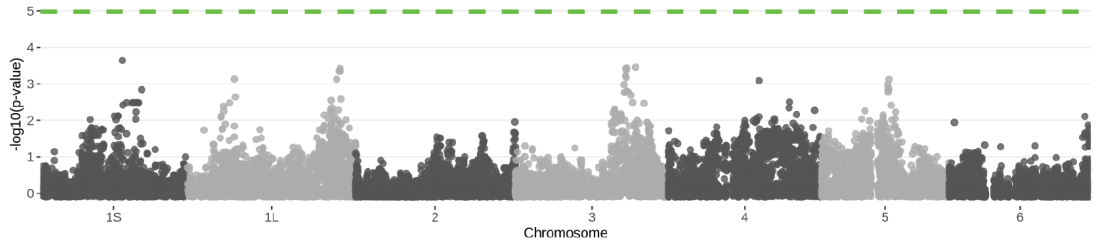

## Number of ovules (Dyn20)

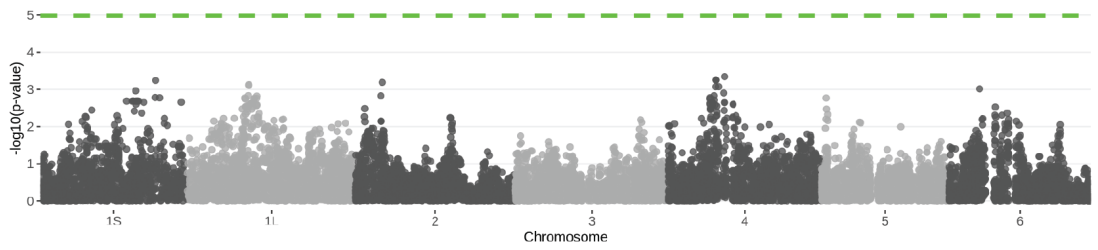

## Sterile tillers (Dyn20)

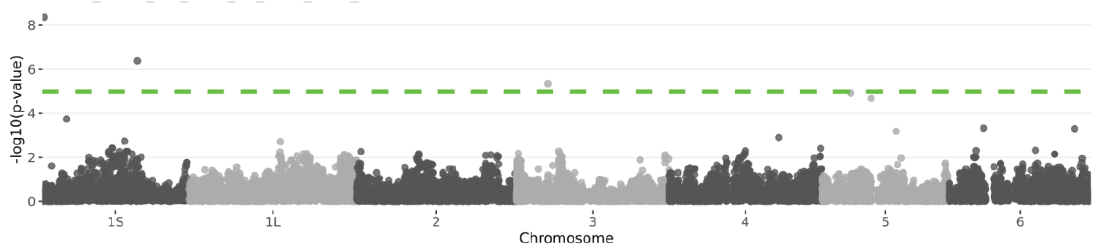

## Maturation (Dyn20)

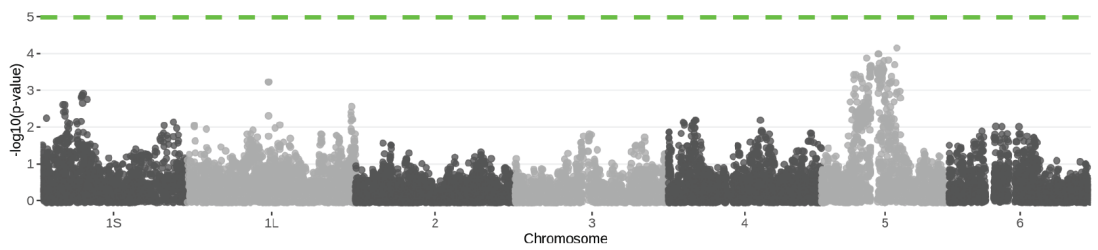

## End of flowering (Dyn20)

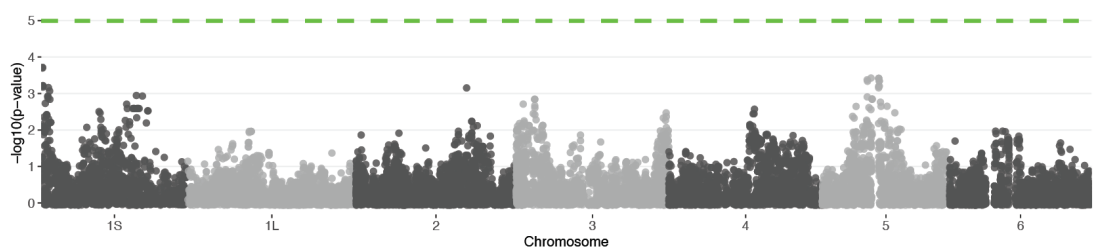

## Duration of flowering (Dyn20)

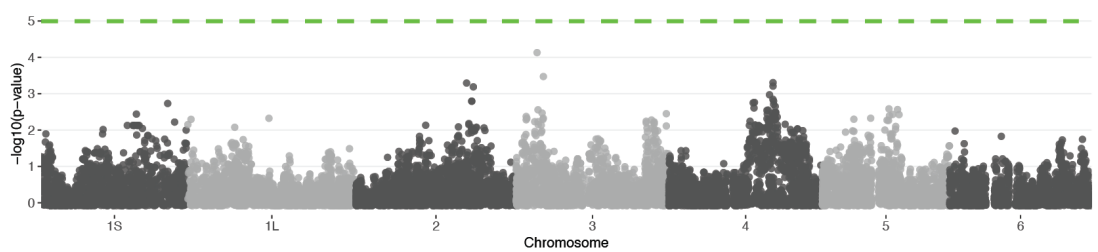

Supplement: 122_2023_4360_MOESM5_ESM.pdf [file 122_2023_4360_MOESM5_ESM.pdf]
