# Supplementary material for: Genetic analysis of global faba bean diversity, agronomic traits and selection signatures
Source: PubMed Central journal article supplement (PMC10115707; doi:10.1007/s00122-023-04360-8), 2023-04-19

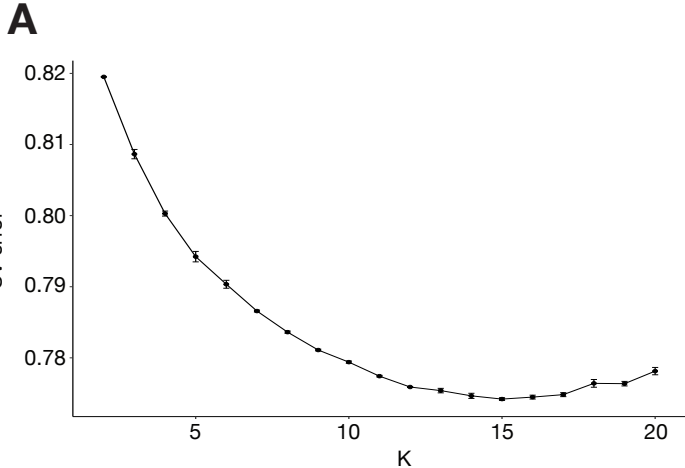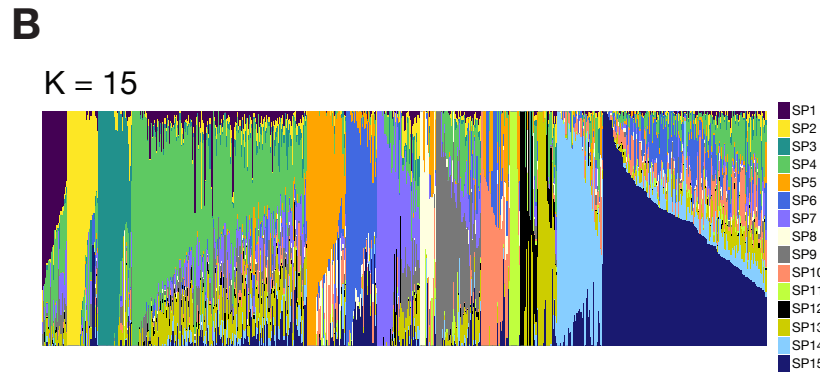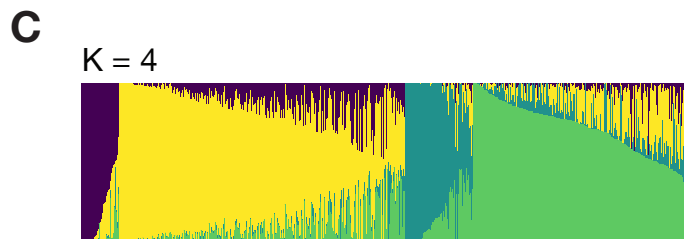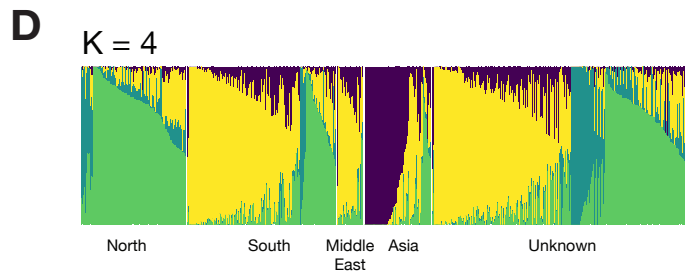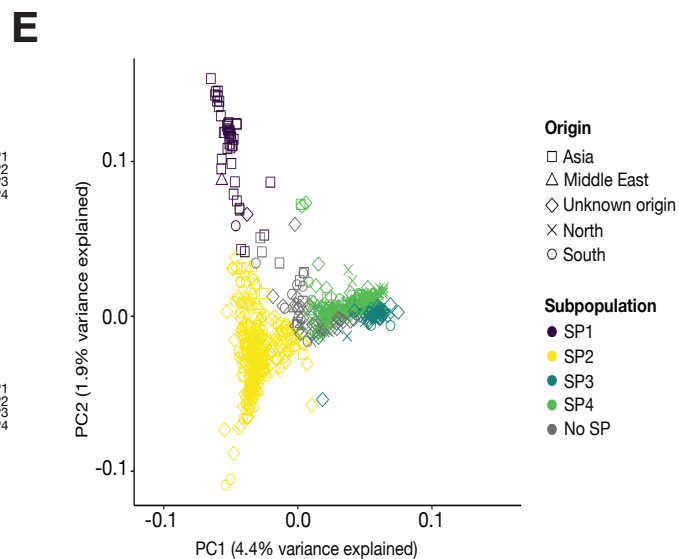

Supplement: 122_2023_4360_MOESM6_ESM.pdf [file 122_2023_4360_MOESM6_ESM.pdf]
