# Supplementary material for: Genetic analysis of global faba bean diversity, agronomic traits and selection signatures
Source: PubMed Central journal article supplement (PMC10115707; doi:10.1007/s00122-023-04360-8), 2023-04-19

**SP1 vs. SP3**

**SP2 vs. SP3**

**Chr1S**

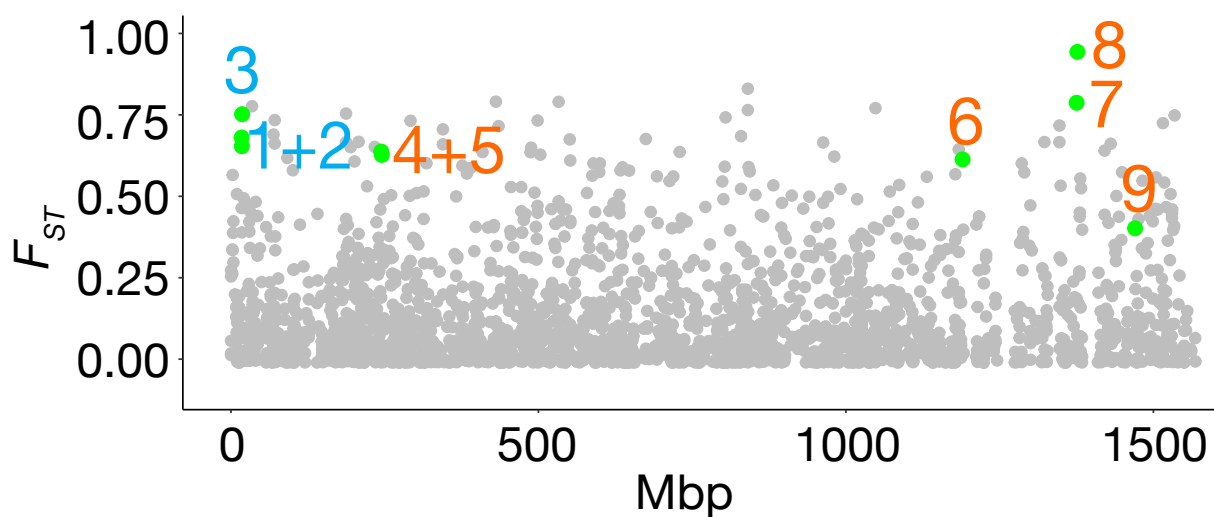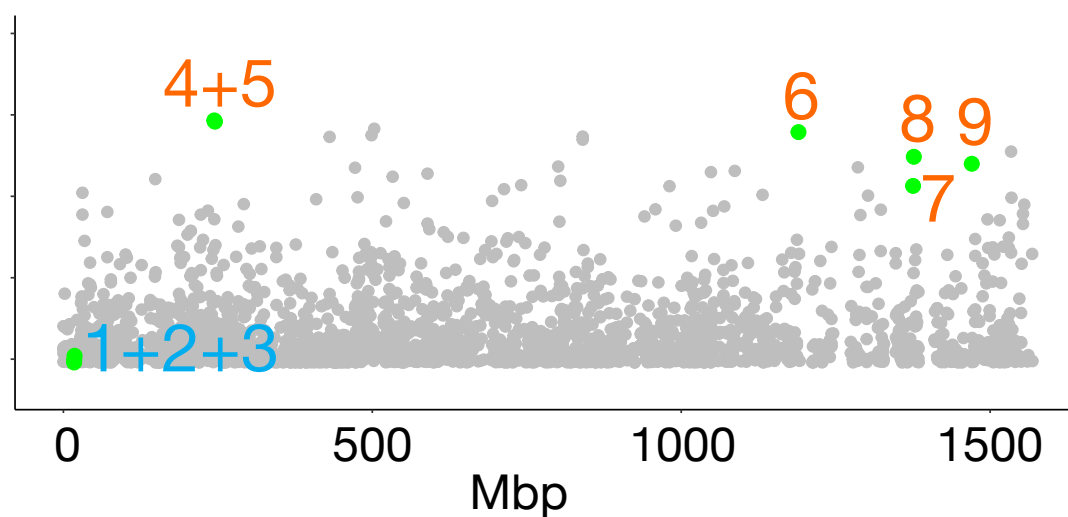

**Chr1L**

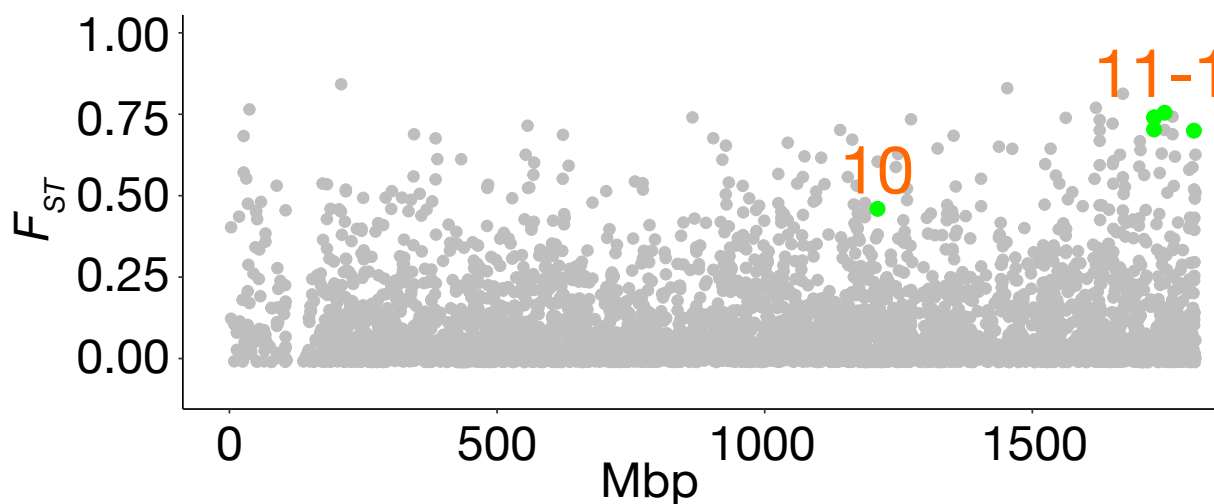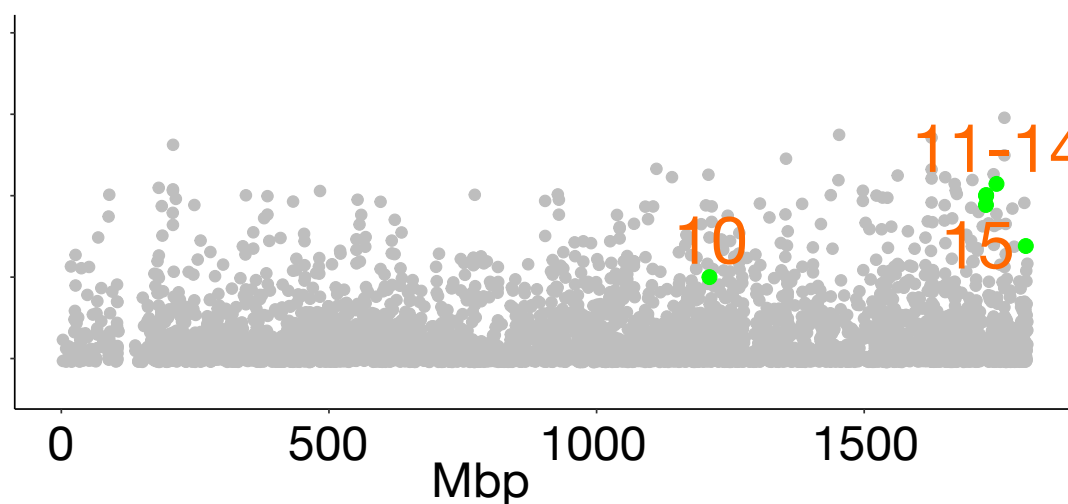

**Chr2**

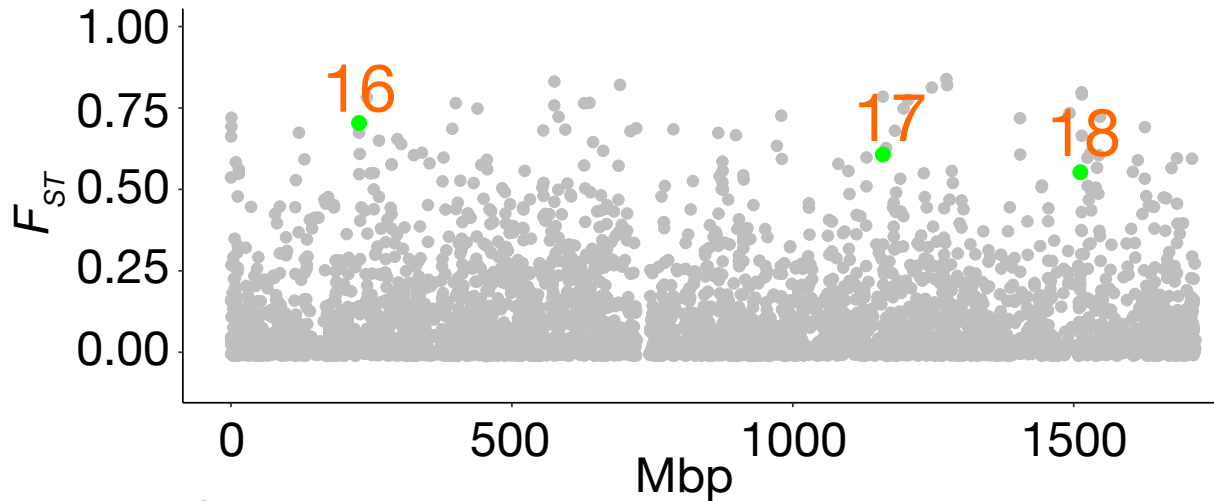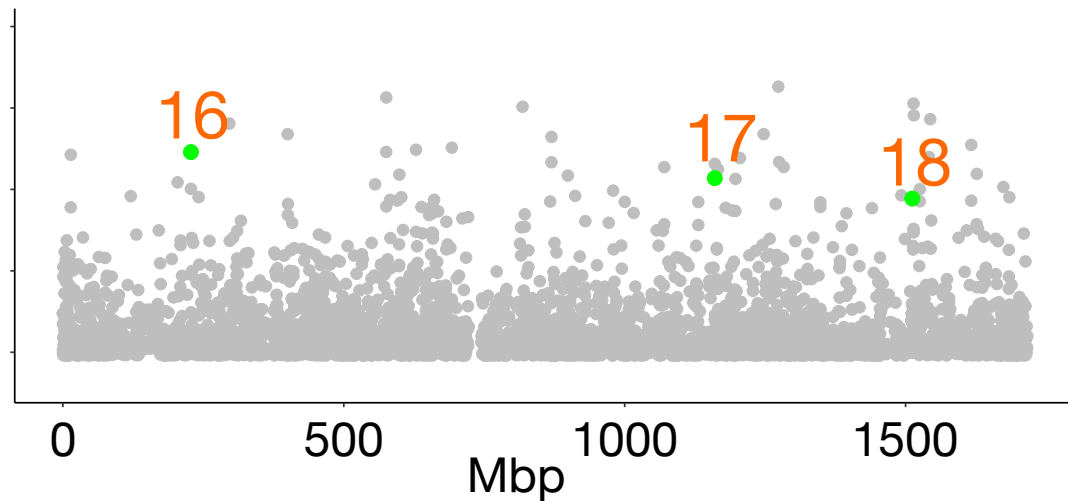

**Chr3**

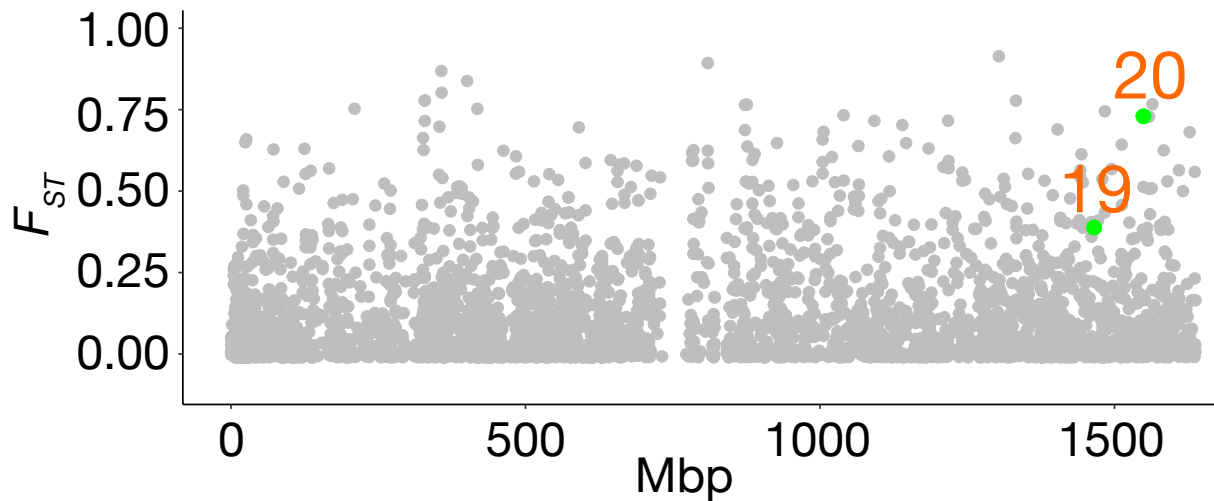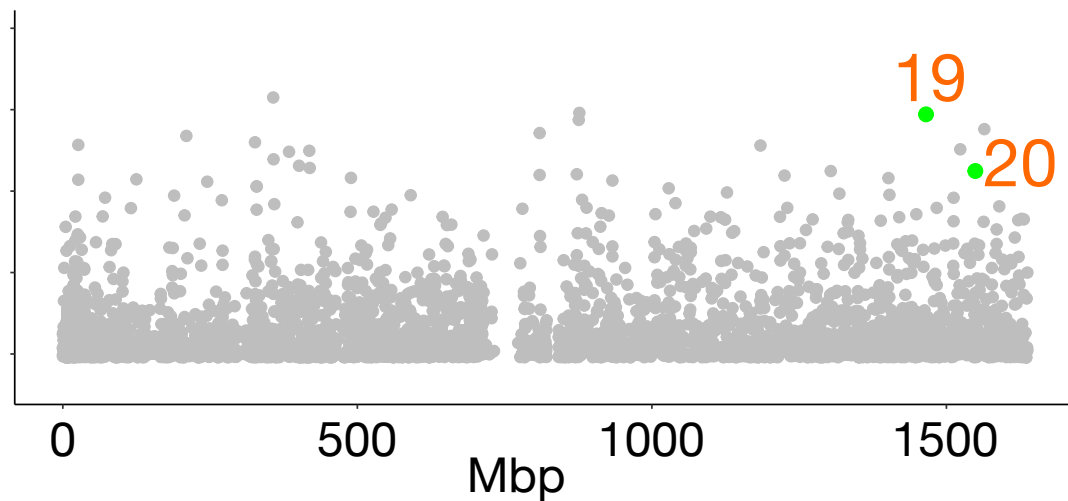

**Chr4**

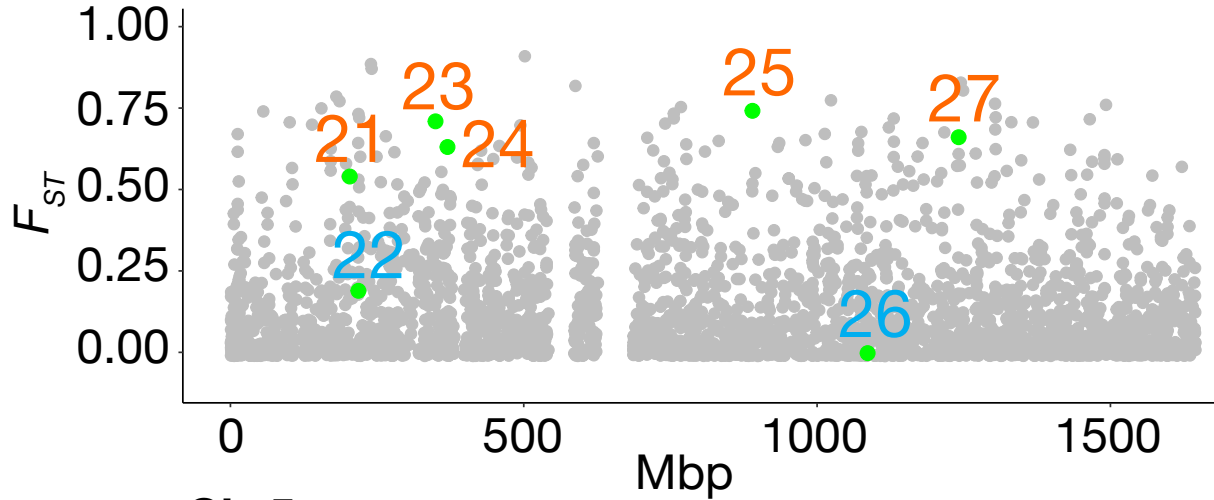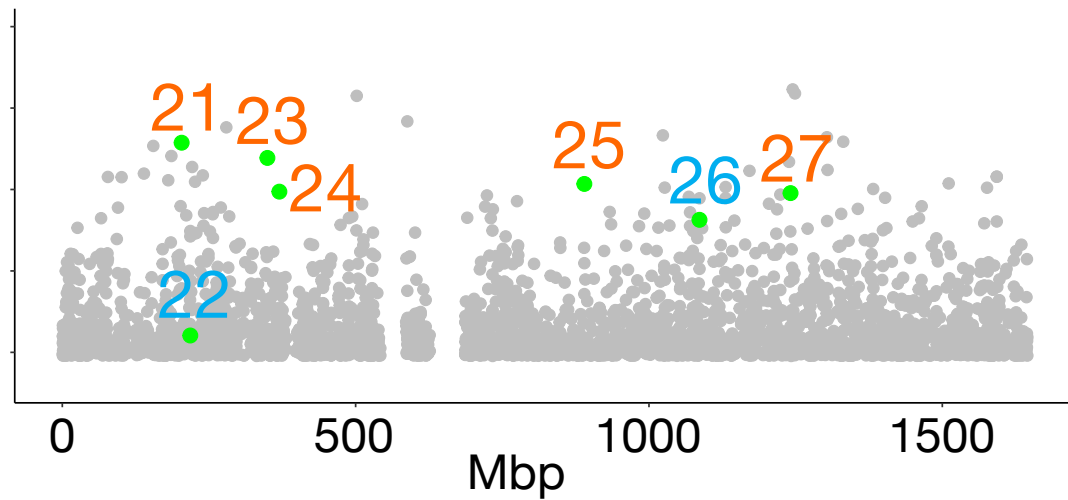

**Chr5**

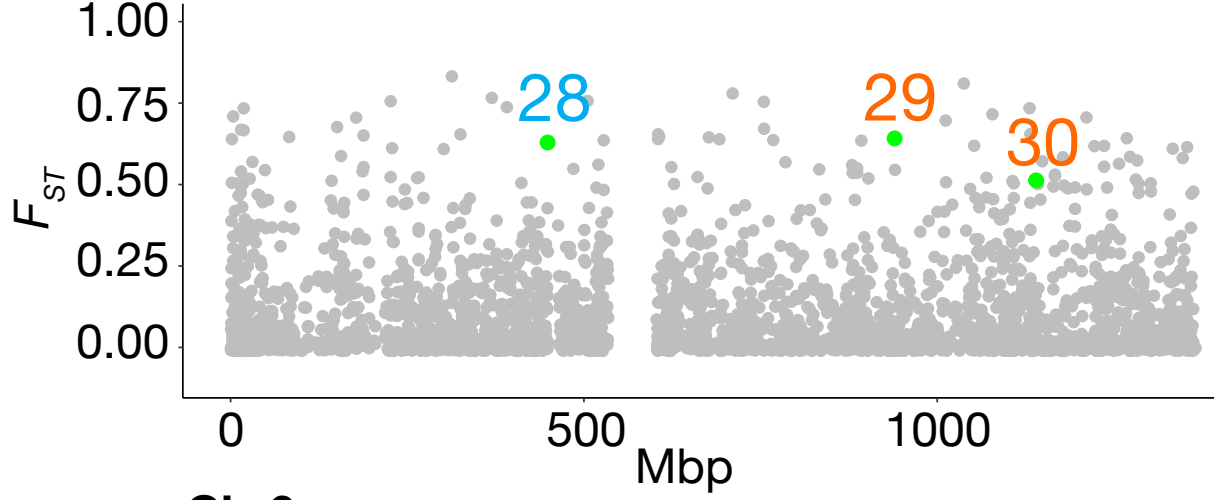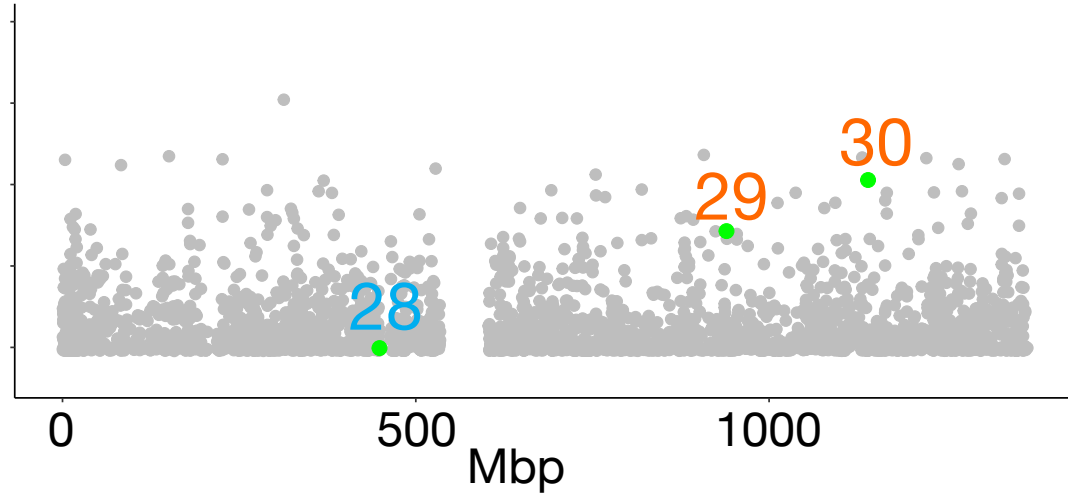

**Chr6**

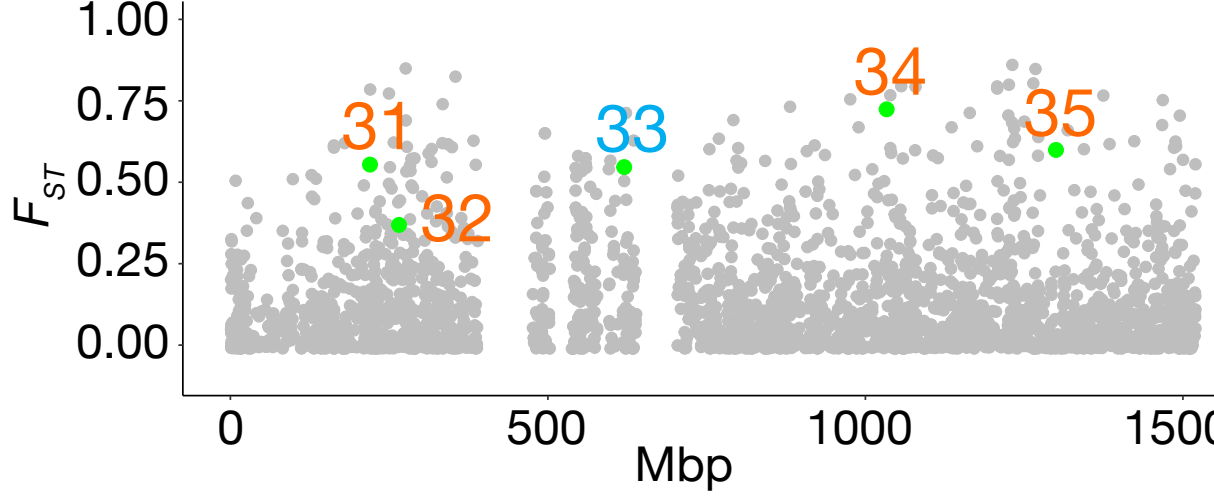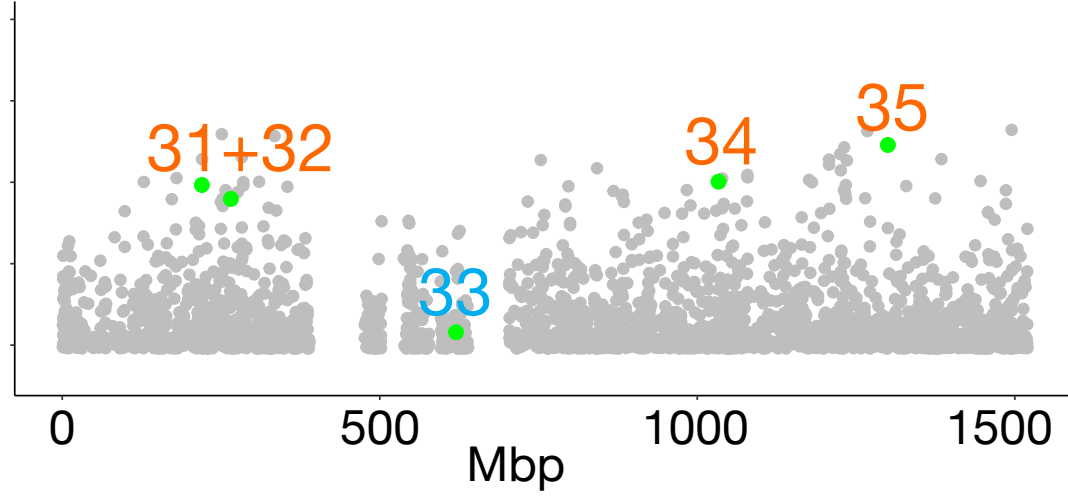

Supplement: 122_2023_4360_MOESM8_ESM.pdf [file 122_2023_4360_MOESM8_ESM.pdf]
