# Supplementary material for: Genetic analysis of global faba bean diversity, agronomic traits and selection signatures
Source: PubMed Central journal article supplement (PMC10115707; doi:10.1007/s00122-023-04360-8), 2023-04-19

**A**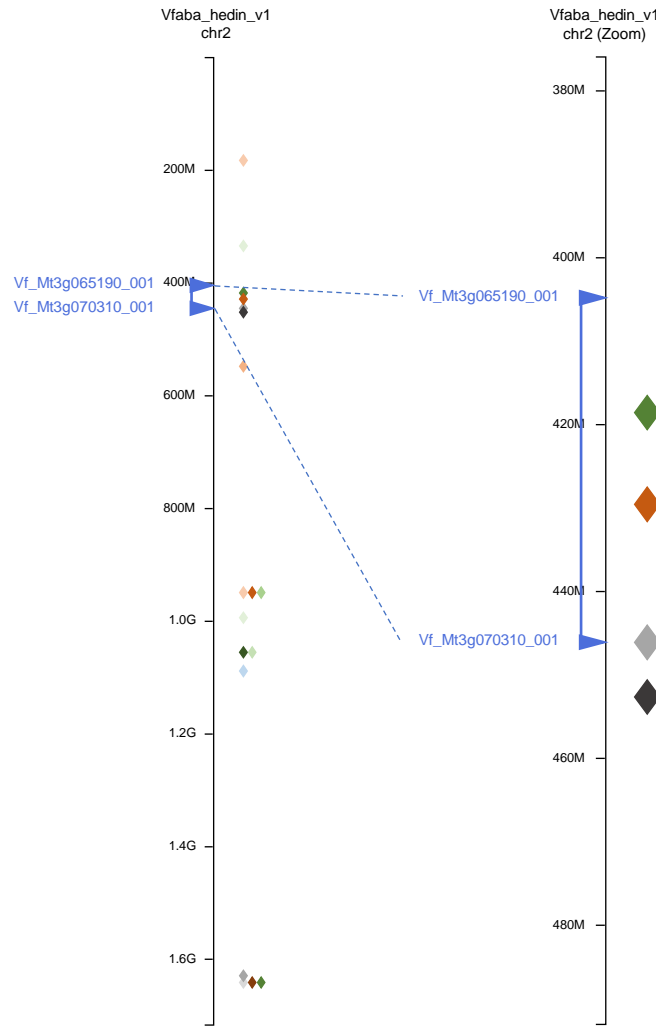

- Seed area (Dyn20)
- Seed area (Dyn21)
- Seed area (Sej20)
- Seed area (Sej21)
- Seed area (All environments)
- Seed width (Dyn20)
- Seed width (Dyn21)
- Seed width (Sej20)
- Seed width (Sej21)
- Seed width (All environments)
- Seed length (Dyn20)
- Seed length (Sej21)
- Seed length (All environments)
- TGW (Dyn21)
- TGW (Sej20)
- TGW (Sej21)
- TGW (All environments)

**B**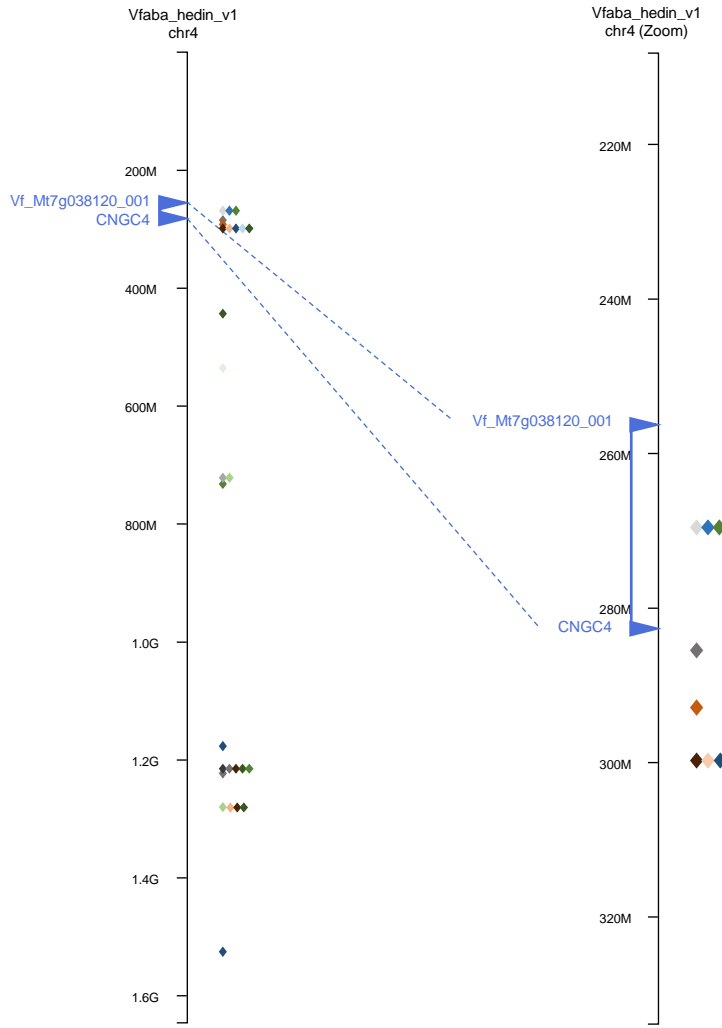

Supplement: 122_2023_4360_MOESM12_ESM.pdf [file 122_2023_4360_MOESM12_ESM.pdf]
