# Supplementary material for: Genetic analysis of global faba bean diversity, agronomic traits and selection signatures
Source: PubMed Central journal article supplement (PMC10115707; doi:10.1007/s00122-023-04360-8), 2023-04-19
Supplement: 122_2023_4360_MOESM22_ESM.pdf [file 122_2023_4360_MOESM22_ESM.pdf]

# Pretzel instructions

## 1. Log in

Access Pretzel Pulses URL: <https://pulses.plantinformatics.io/>

Click Log In in top right

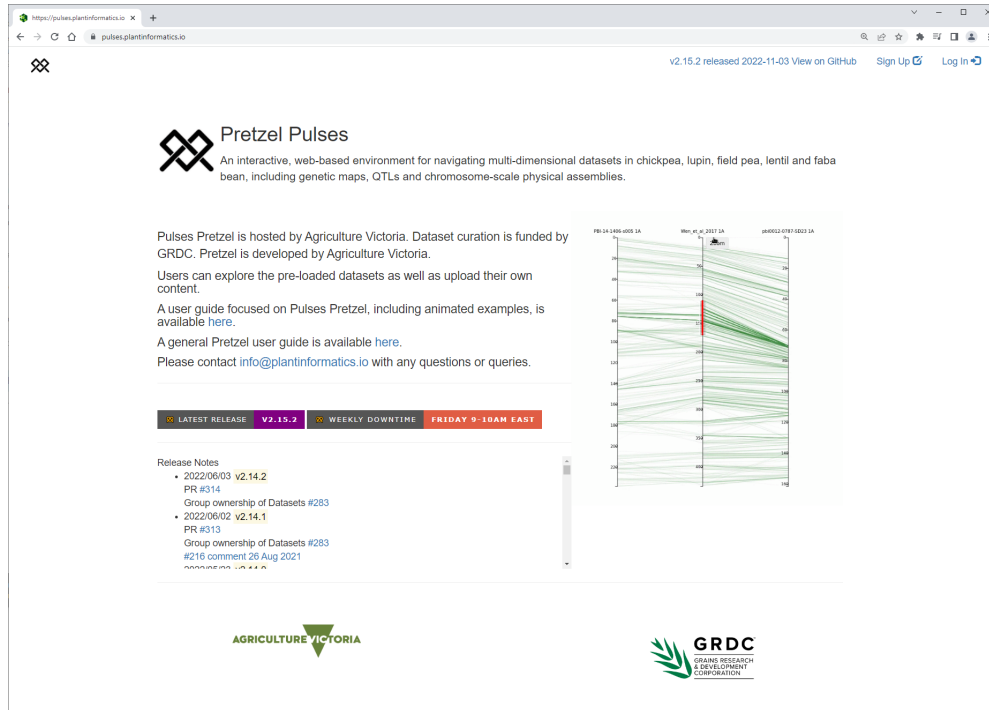

The screenshot shows the Pretzel Pulses homepage. At the top right, it says "v2.15.2 released 2022-11-03 View on GitHub Sign Up Log In". The main heading is "Pretzel Pulses" with a logo. Below it, a description states: "An interactive, web-based environment for navigating multi-dimensional datasets in chickpea, lupin, field pea, lentil and faba bean, including genetic maps, QTLs and chromosome-scale physical assemblies." Further down, it mentions: "Pulses Pretzel is hosted by Agriculture Victoria. Dataset curation is funded by GRDC. Pretzel is developed by Agriculture Victoria. Users can explore the pre-loaded datasets as well as upload their own content. A user guide focused on Pulses Pretzel, including animated examples, is available here. A general Pretzel user guide is available here. Please contact info@plantinformatics.io with any questions or queries." There is a "LATEST RELEASE V2.15.2 WEEKLY DOWNTIME FRIDAY 9-10AM EAST" banner. Below that, "Release Notes" lists updates from 2022/06/03 and 2022/06/02. On the right, there is a visualization of genetic data with labels like "PB14-190-005 SA", "Mm\_41\_2187 SA", and "p0002-078-023 SA". Logos for Agriculture Victoria and GRDC are at the bottom.

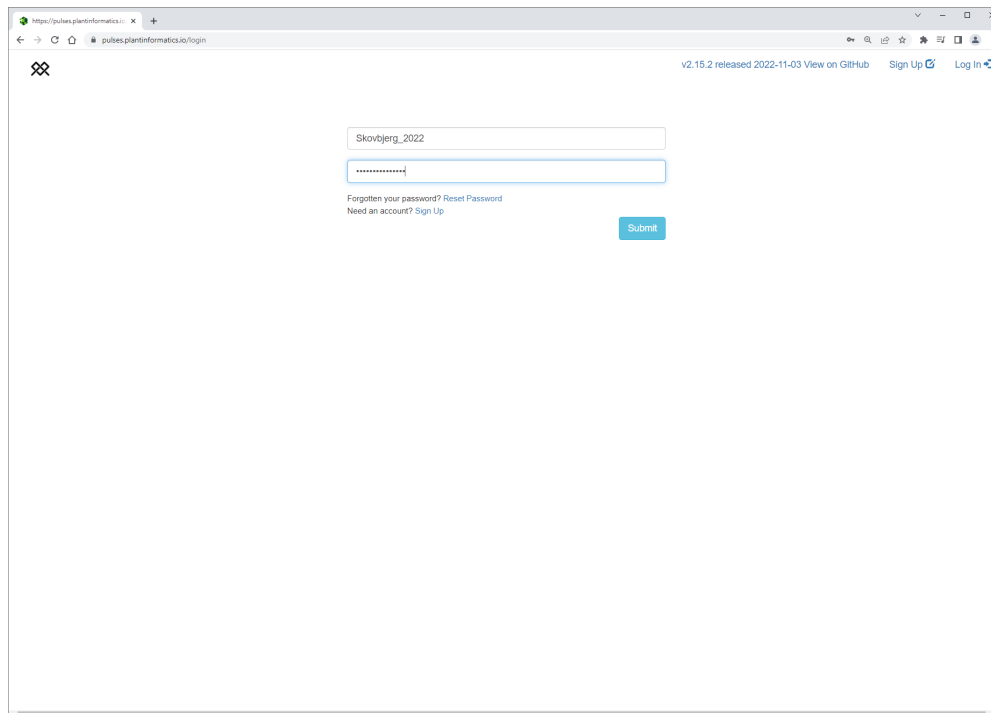

The screenshot shows the login page of Pretzel Pulses. At the top right, it says "v2.15.2 released 2022-11-03 View on GitHub Sign Up Log In". The page has a login form with a text input field containing "Skovbjerg\_2022" and a password input field with masked characters. Below the form, there are links for "Forgot your password? Reset Password" and "Need an account? Sign Up". A blue "Submit" button is at the bottom right of the form area.

Log in with the following details:

Username: Skovbjerg\_2022

Password: FabaBean&ABC123

## 2. Load datasets

Scroll down the dataset explorer on the left of the screen to select the following datasets:

- Vfaba\_hedin\_v1.MedtrA17\_4.0\_mapping – chr5

The screenshot shows the plantinformatics.io mapviewer interface. On the left, the 'Explorer' panel is open, displaying a list of datasets. The dataset 'Vfaba\_hedin\_v1.MedtrA17\_4.0\_mapping' is selected and expanded to show chromosome options: chr1L, chr1S, chr2, chr3, chr4, chr5 (highlighted), and chr6. The main map area displays 'Vfaba\_hedin\_v1:chr5' with a vertical scale from 1000M to 1.30. Below the map, the 'Dataset' panel shows details for 'Vfaba\_hedin\_v1.MedtrA17\_4.0\_mapping', including its namespace, parent, creation and update dates, and API host.

- Medicago\_truncatula.MedtrA17\_4.0.annotation – chr7

The screenshot shows the plantinformatics.io mapviewer interface with a comparison map. The left y-axis is labeled 'Vfaba\_hedin\_v1:chr5' and the right y-axis is labeled 'Medicago\_truncatula.MedtrA17\_4.0:7'. The map displays numerous green lines connecting the two datasets across their respective scales. The 'Explorer' panel on the left shows 'Medicago\_truncatula.MedtrA17\_4.0.annotation' selected and expanded to show chromosome options 1 through 8, with 7 highlighted. The 'Dataset' panel below the map shows details for 'Medicago\_truncatula.MedtrA17\_4.0.annotation', including its namespace, parent, creation and update dates, and API host.

- Skovbjerg\_2022 – chr5

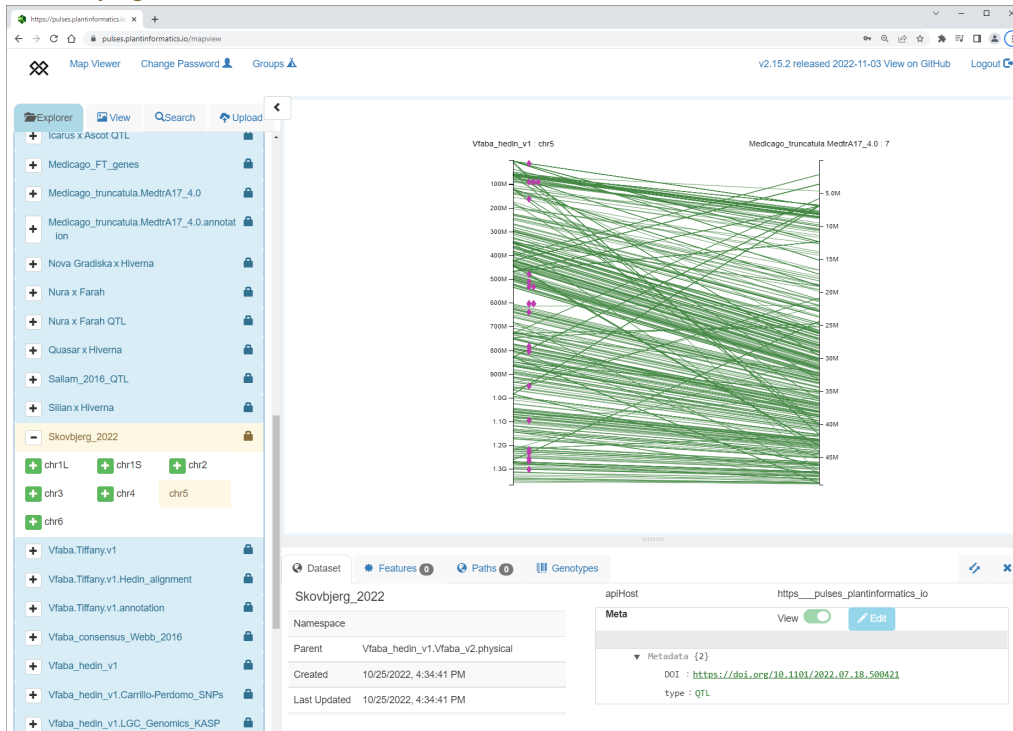

- 20210909\_Fababean\_SNP\_SSR\_Seq\_Info – chr5

- Icarus x Ascot QTL – Chr-V

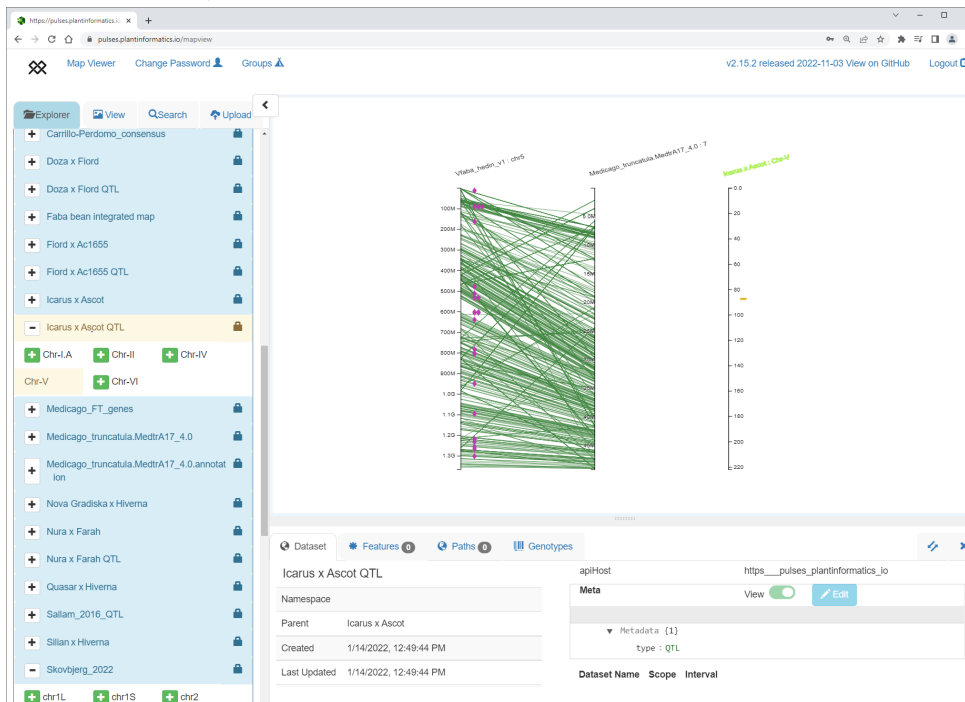

## - Medicago\_FT\_genes - 7

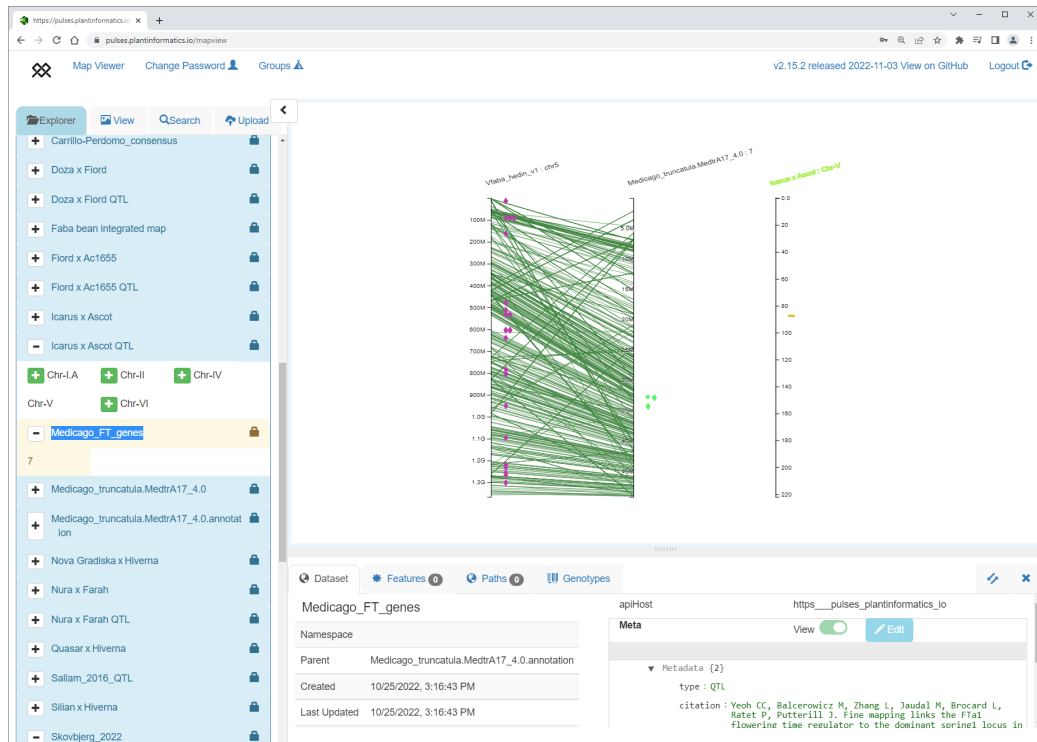

### 3. Re-arrange axes

Hold the CTRL key, click and drag on the Medicago axis to move it to the left side.

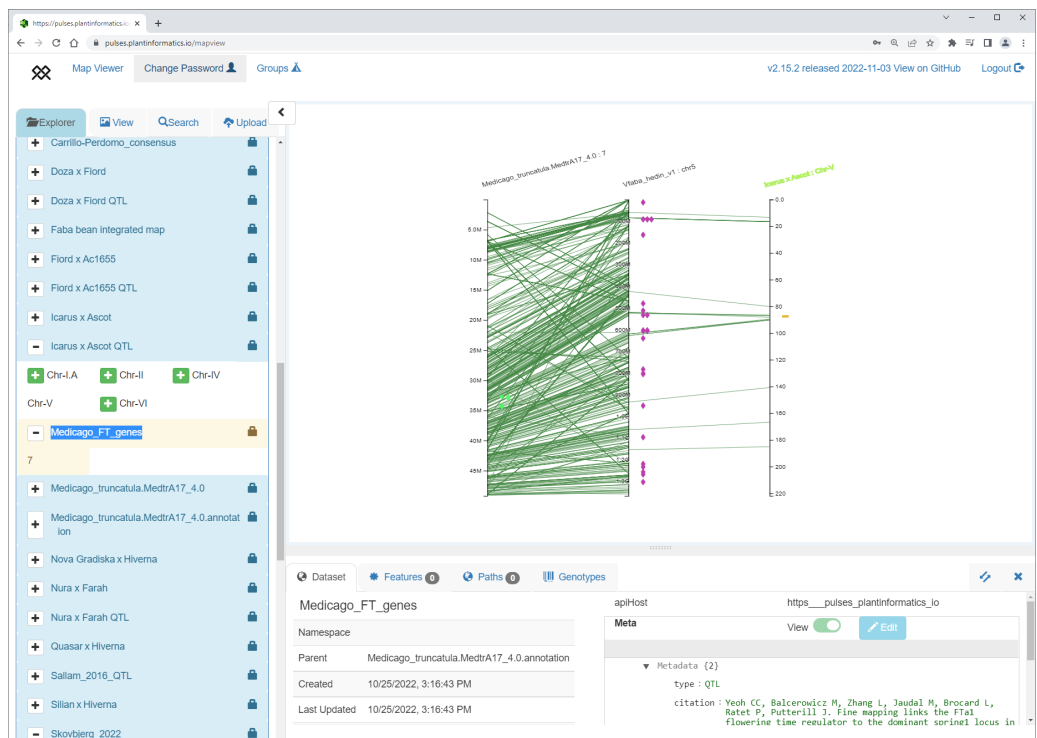

#### 4. Toggle displayed traits

Click on the View tab on the left side panel.

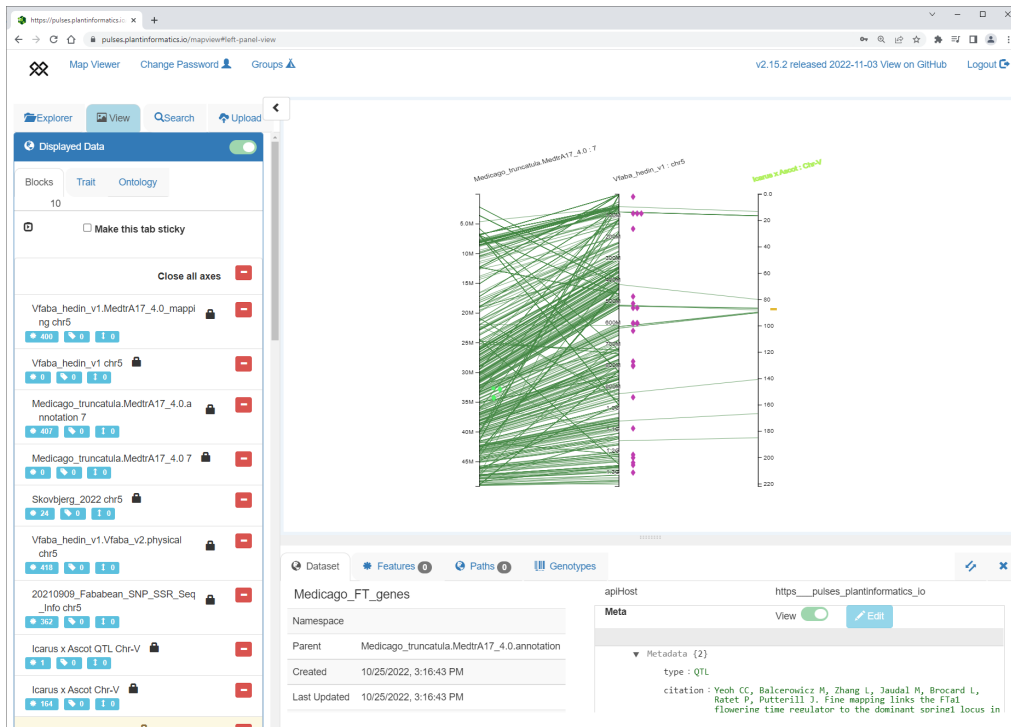

Within the Displayed Data sub-panel, select the Trait tab at the top.

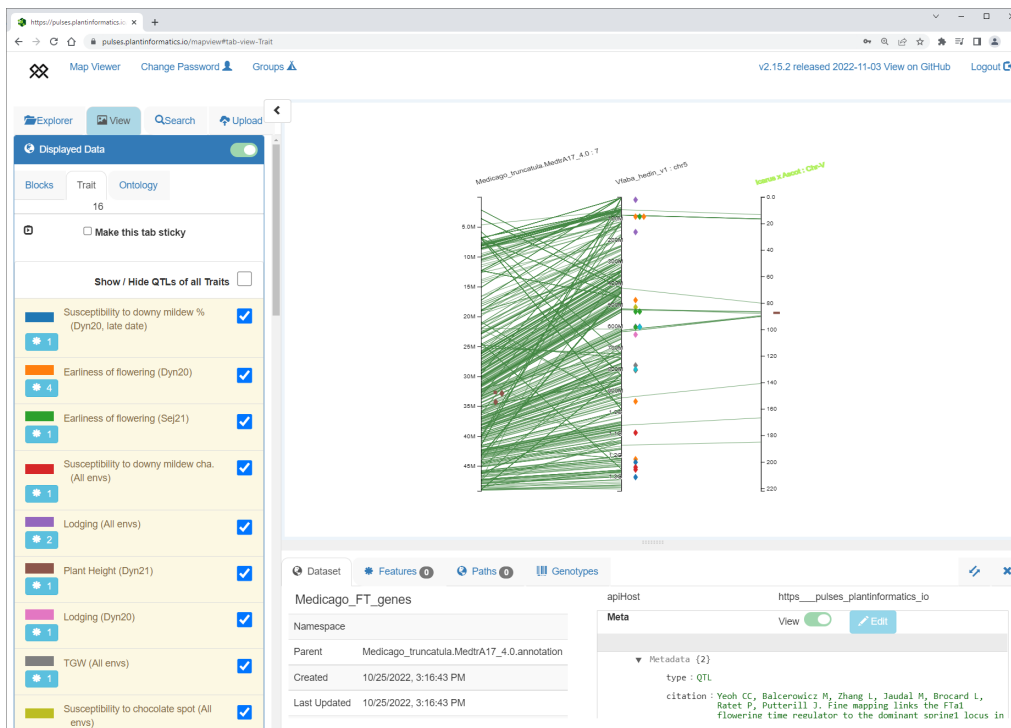

This colours the QTL symbols according to trait. Mouse over any trait symbols for detail on that QTL.

## 5. Brush (select) a region of an axis

Move the mouse over the axis, click and drag up or down to “brush” (make a selection on) the axis.

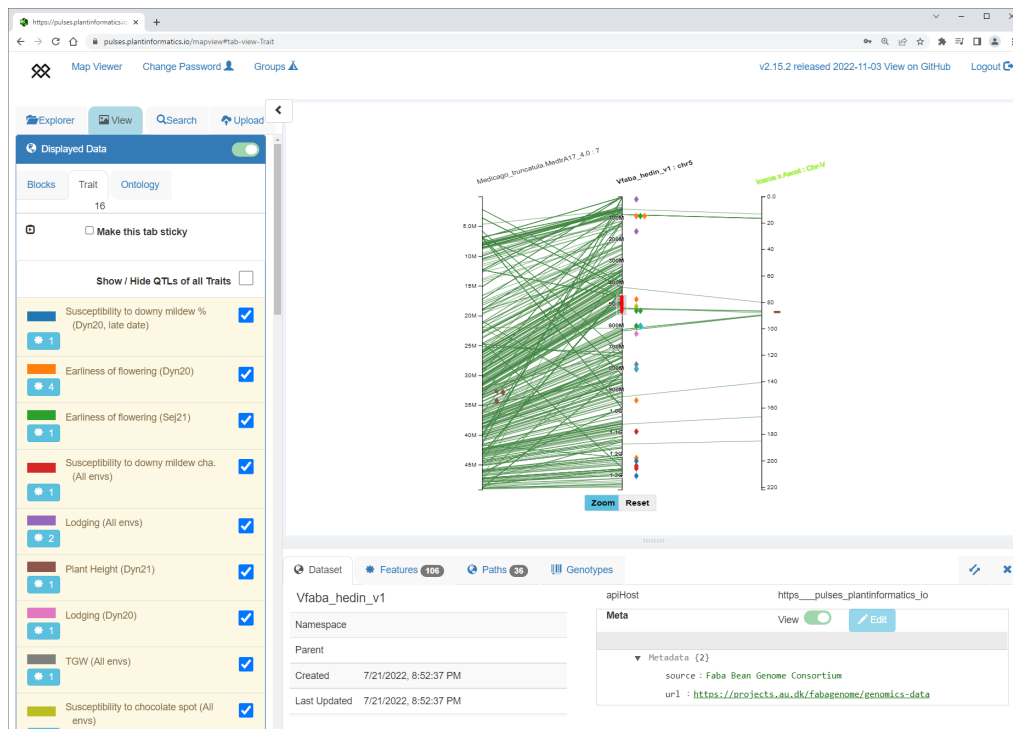

The selected region will be indicated by a grey rectangle and underlying features shown in red.

## 6. Zoom on selected region

Click the Zoom button to zoom the axis to the selected region.

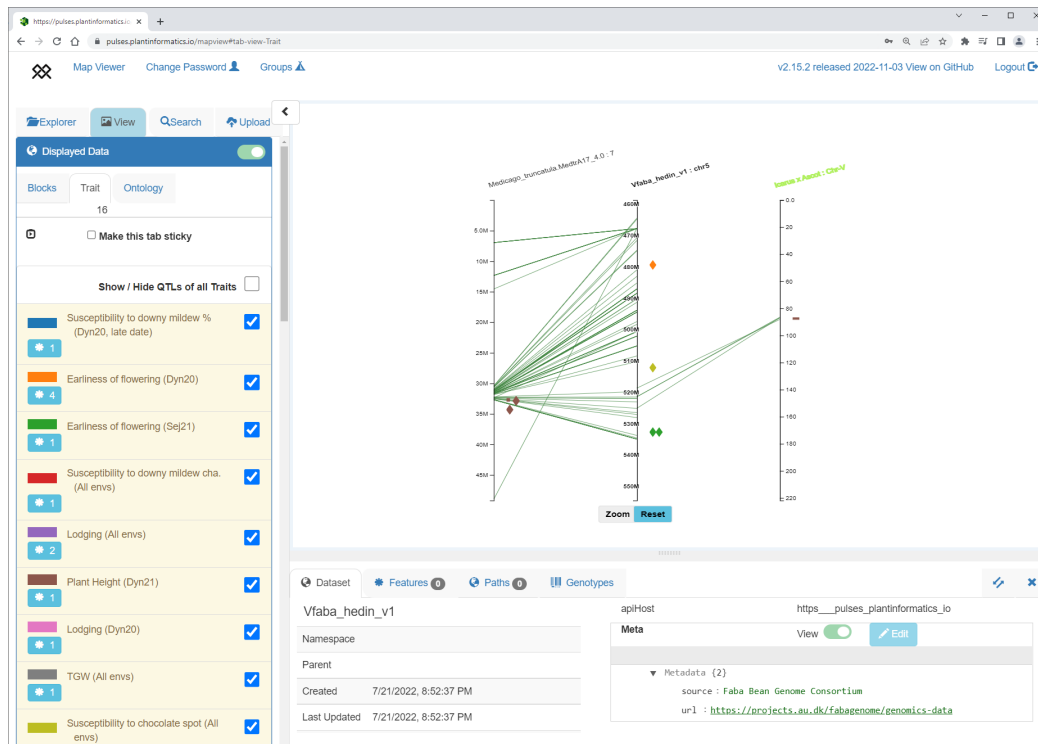

Reset the zoom by clicking the Reset button.

## 7. Tweak visualisation options

In the View tab of the left panel, scroll down to access visualisation options.

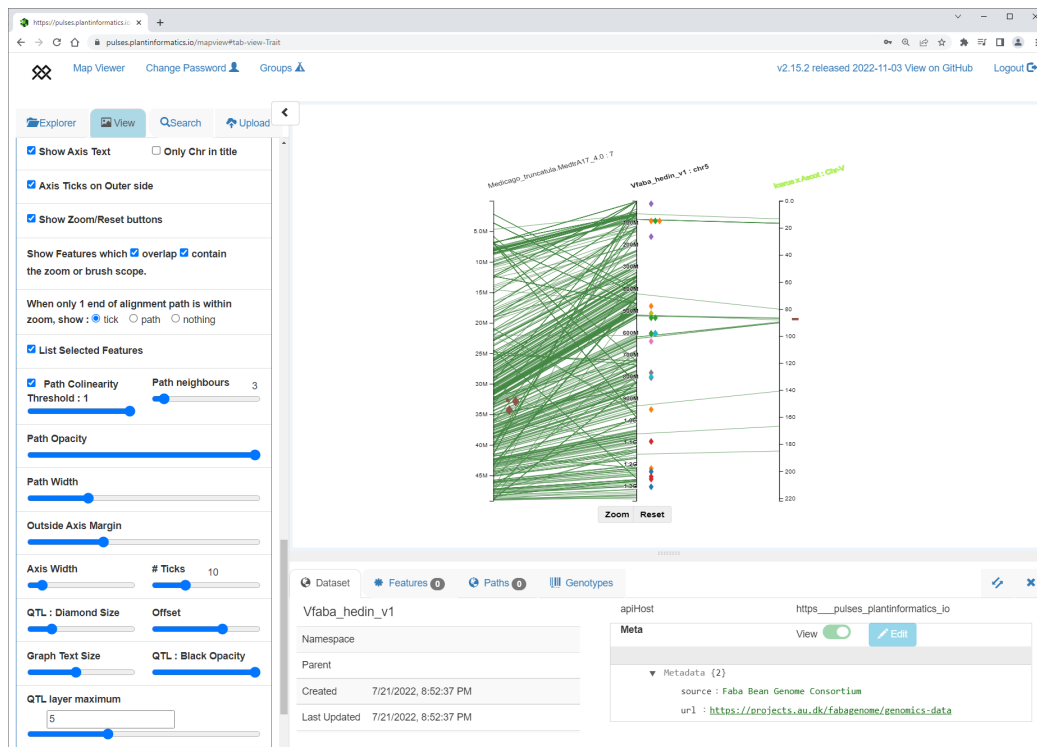

Reduce Path Opacity to reduce the opacity of the paths and the Path Collinearity Threshold to remove some of the cross-over paths.

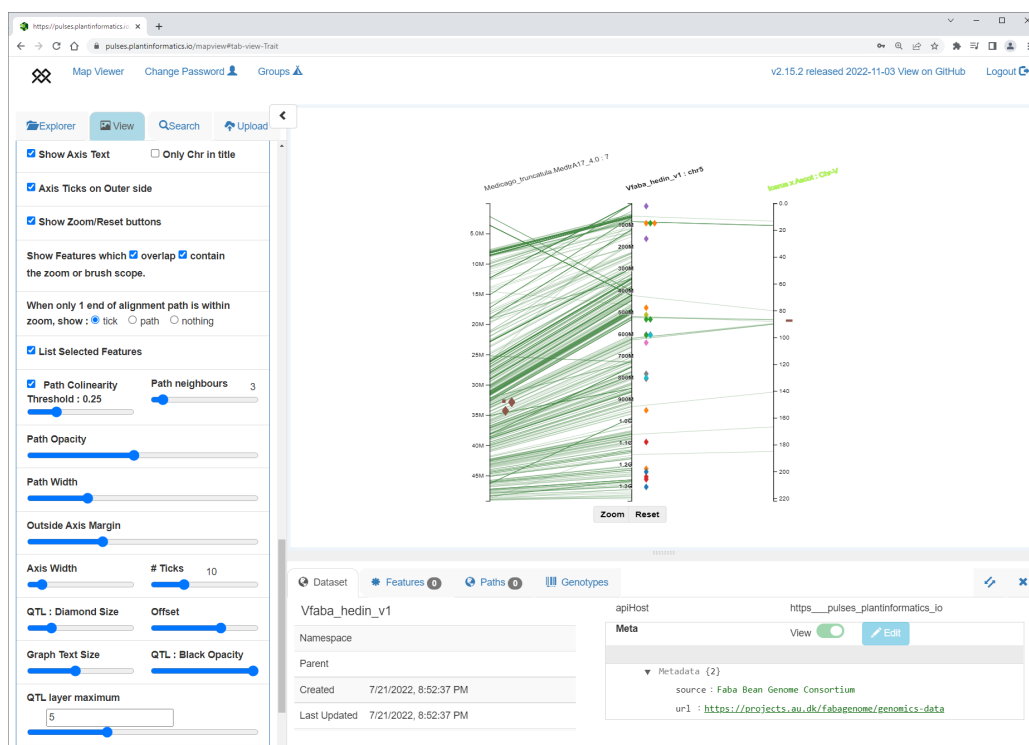

## 8. Zoom in to regions of interest

Using the brush operation described in step 5 above, select the regions of interest around the QTLs loaded.

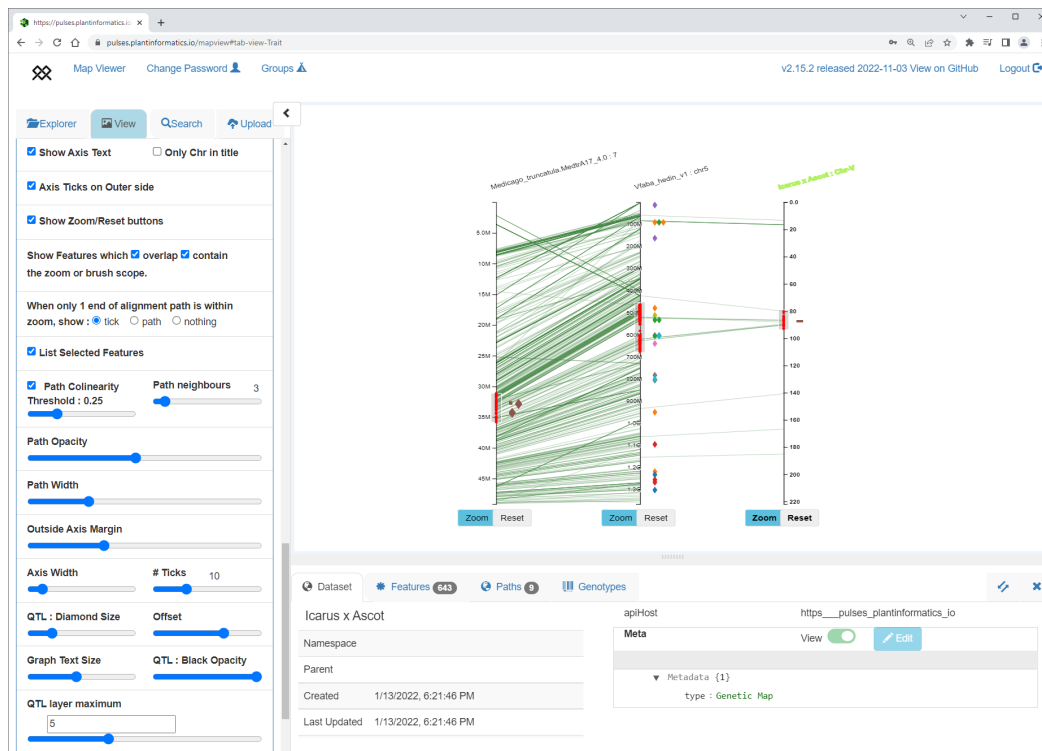

Zoom in to the brushed regions.

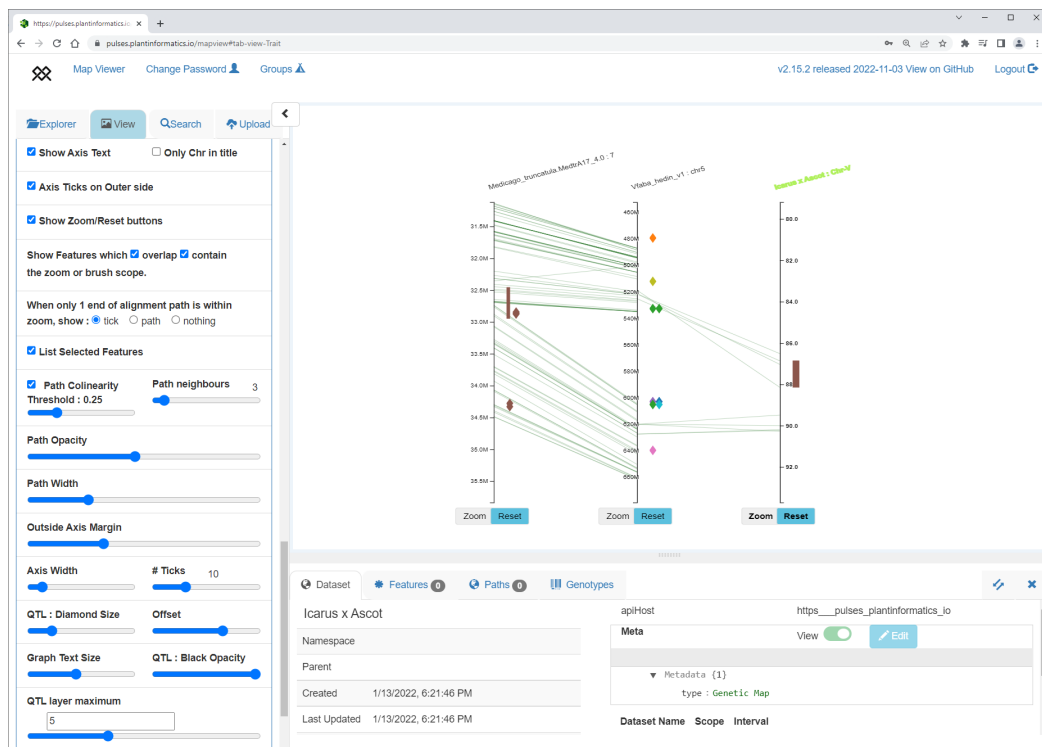



## 9. Visualise features in a table

Once a region of interest has been brushed, click the Features tab in the bottom panel.

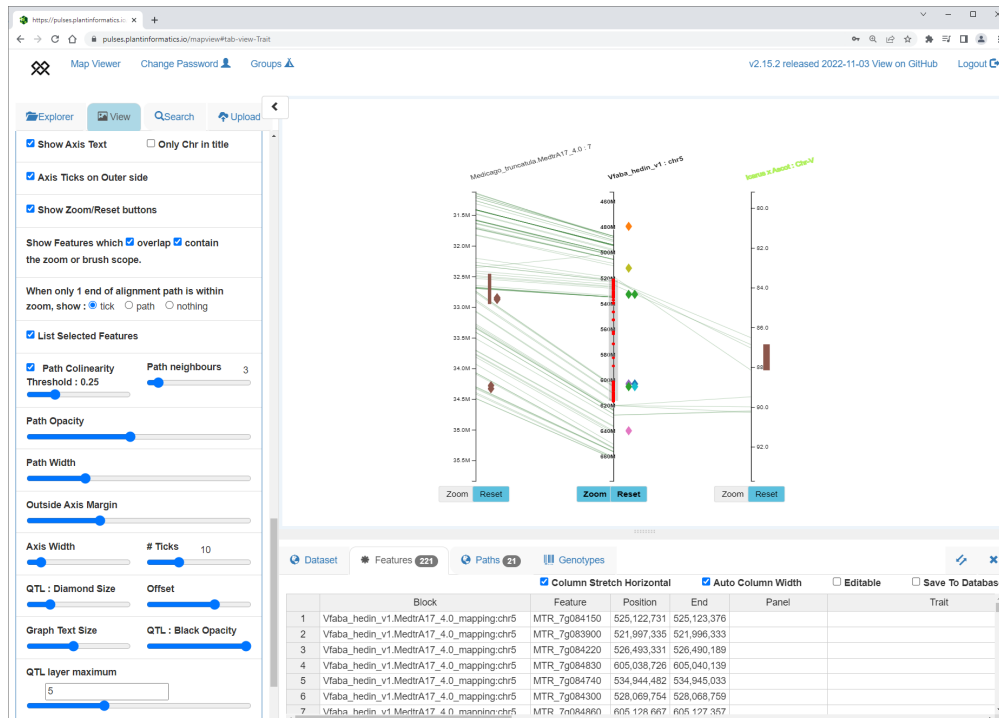

The displayed table shows all features in the brushed region (based on the datasets loaded in step 2 above).

## 10. Explore candidate genes in brushed region

Click the Explorer tab on the left panel and add the dataset *Vfaba\_hedin\_v1.annotation – chr5*.

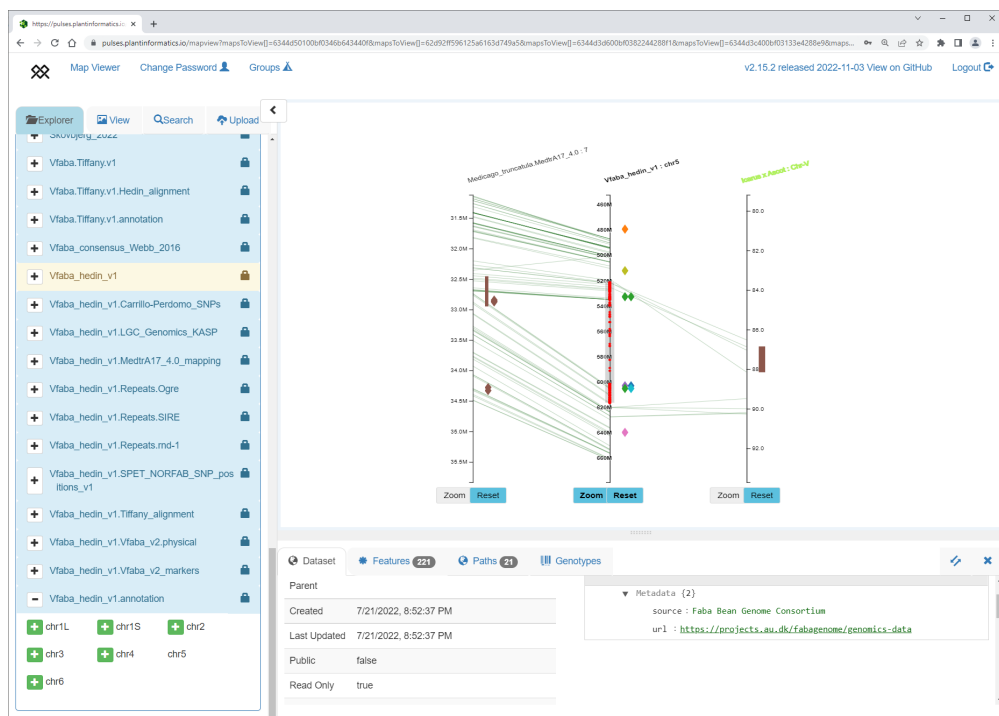

Click on the **Vfaba\_hedin\_v1 : chr5** text at the top of the axis to open the axis menu.

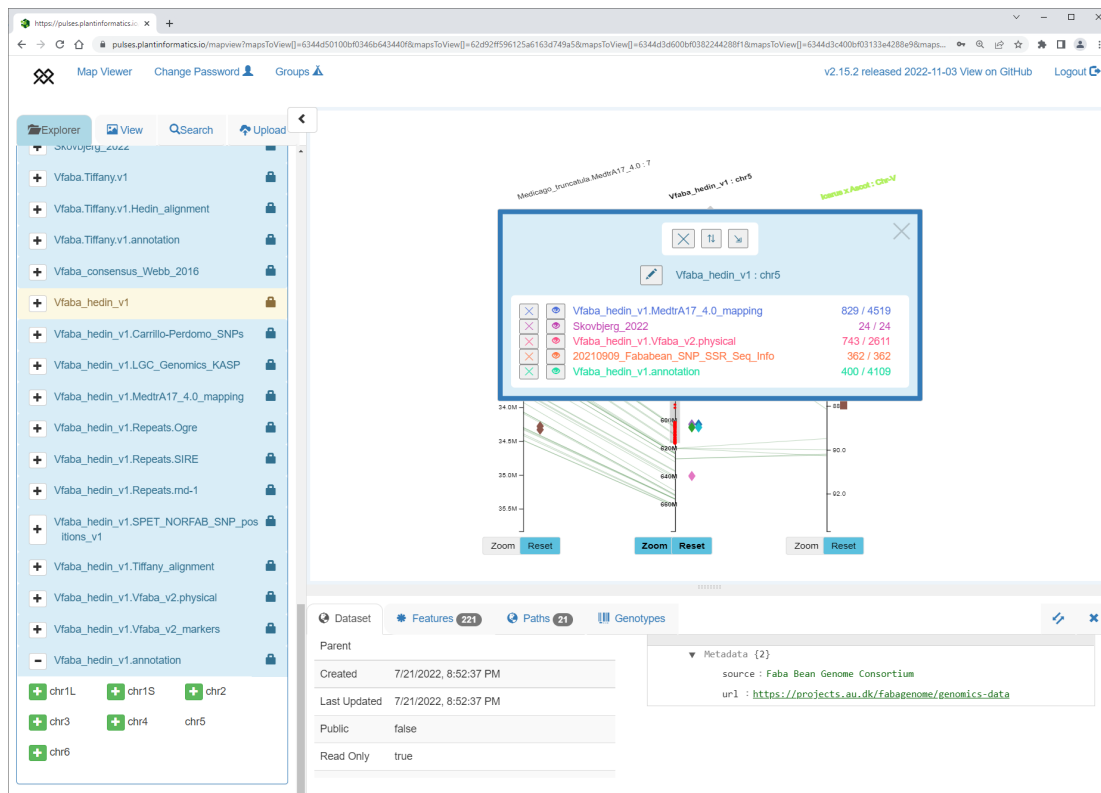

Click the icon with arrow pointing to the bottom right to split the axis.

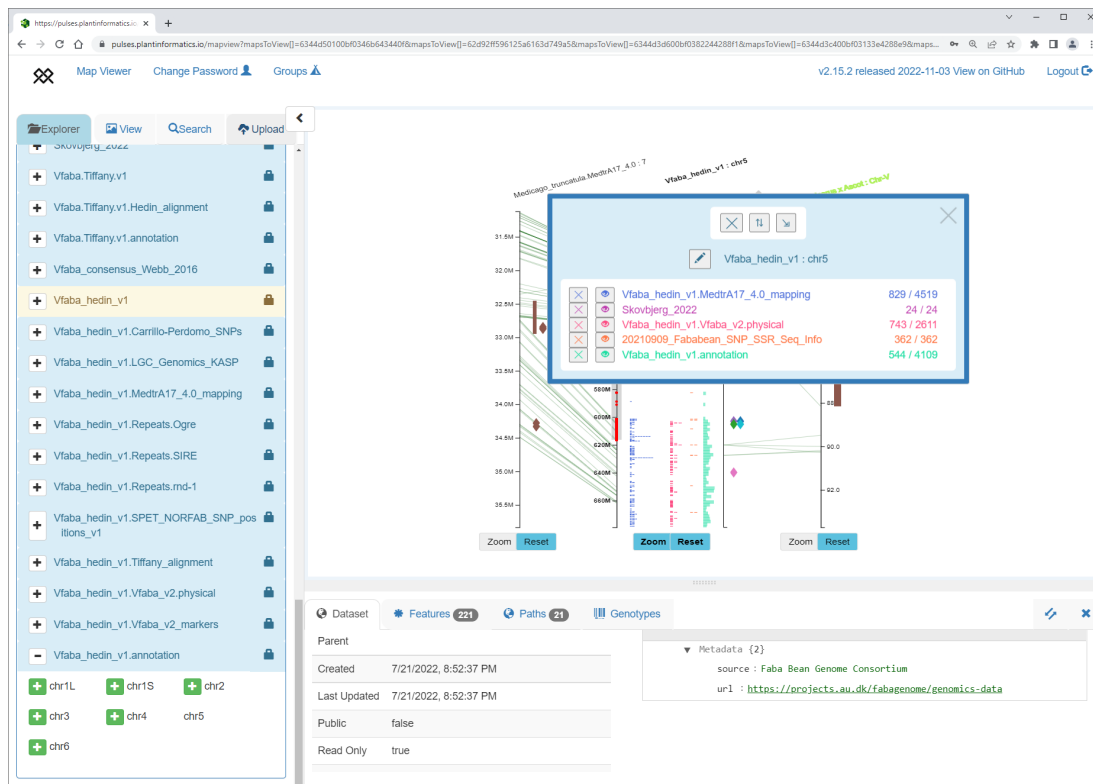

The split axis now displays the loaded datasets as individual features, or histograms if too many to draw. Zooming in will progressively re-draw the features.

Click the cross in the top right of the axis menu to close it. Now brush a region of interest and explore the Features table by clicking the Features tab in the bottom panel.

The screenshot shows a web-based genomic data visualization interface. The top panel displays a map view of a chromosome region with several tracks. The tracks include:
 

- Medicago truncatula MedtrA17\_4.0\_7**: A track showing gene models with exons and introns.
- Vfaba\_hedin\_v1 - chr5**: A track showing a genomic region with various features and markers.
- Genome v. Annot. - Chr5**: A track showing the genome annotation for chromosome 5.

 The map view includes zoom and reset buttons for each track. The bottom panel shows a table of features with columns for Block, Feature, Position, End, Panel, and Trait. The table is currently displaying features 366 through 372.

| Block                          | Feature                  | Position    | End         | Panel | Trait |
|--------------------------------|--------------------------|-------------|-------------|-------|-------|
| Vfaba_hedin_v1.annotation:chr5 | Vfaba.Hedin2.R1.5g086480 | 604,183,551 | 604,182,427 |       |       |
| Vfaba_hedin_v1.annotation:chr5 | Vfaba.Hedin2.R1.5g082520 | 522,613,869 | 522,607,274 |       |       |
| Vfaba_hedin_v1.annotation:chr5 | Vfaba.Hedin2.R1.5g082880 | 522,935,409 | 522,924,145 |       |       |
| Vfaba_hedin_v1.annotation:chr5 | Vfaba.Hedin2.R1.5g084600 | 533,747,289 | 533,749,805 |       |       |
| Vfaba_hedin_v1.annotation:chr5 | Vfaba.Hedin2.R1.5g083320 | 524,152,225 | 524,150,660 |       |       |
| Vfaba_hedin_v1.annotation:chr5 | Vfaba.Hedin2.R1.5g082720 | 522,688,361 | 522,685,914 |       |       |
| Vfaba_hedin_v1.annotation:chr5 | Vfaba.Hedin2.R1.5g082640 | 522,683,142 | 522,682,525 |       |       |
